# Supplementary material for: Egocentric sexual networks of men who have sex with men in the United States: Results from the ARTnet study
Source: PubMed Central journal article supplement — Epidemics. Author manuscript; Available in PMC 2020 Mar 24. (PMC7089812; doi:10.1016/j.epidem.2020.100386), 2020-01-24

# **Egocentric Sexual Networks of Men Who Have Sex with Men in the United States: Results from the ARTnet Study**

Kevin M. Weiss,MPH<sup>1</sup> Steven M. Goodreau,PhD<sup>2</sup> Martina Morris,PhD<sup>3</sup>

Pragati Prasad,MPH<sup>1</sup> Ramya Ramaraju,MPH<sup>1</sup> Travis Sanchez,PhD<sup>1</sup> Samuel M. Jenness,PhD<sup>1</sup>

<sup>1</sup> Department of Epidemiology, Emory University

<sup>2</sup> Department of Anthropology, University of Washington

<sup>3</sup> Departments of Statistics and Sociology, University of Washington

## **Supplemental Appendix**

**Supplemental Table 1.** Heterogeneity in Network Degree by Demographics and HIV Status, Stratified by Partnership Type and Anal versus Oral Sexual Activity, among MSM in the United States

|                                   | Main and Casual      |                      | Main                 |                      | Casual               |                      |
|-----------------------------------|----------------------|----------------------|----------------------|----------------------|----------------------|----------------------|
|                                   | AI                   | OI                   | AI                   | OI                   | AI                   | OI                   |
|                                   | <i>Mean (95% CI)</i> |
| <b>Total Sample</b>               | 1.00 (0.97-1.03)     | 1.17 (1.14-1.20)     | 0.41 (0.39-0.43)     | 0.44 (0.43-0.46)     | 0.59 (0.57-0.61)     | 0.73 (0.70-0.75)     |
| <b>Race/Ethnicity</b>             |                      |                      |                      |                      |                      |                      |
| Black, Non-Hispanic               | 0.95 (0.84-1.07)     | 1.08 (0.96-1.20)     | 0.29 (0.23-0.35)     | 0.30 (0.24-0.37)     | 0.67 (0.57-0.77)     | 0.78 (0.68-0.89)     |
| White, Non-Hispanic               | 1.01 (0.98-1.05)     | 1.20 (1.17-1.24)     | 0.42 (0.40-0.45)     | 0.46 (0.44-0.48)     | 0.59 (0.56-0.61)     | 0.74 (0.71-0.77)     |
| Hispanic                          | 1.00 (0.93-1.08)     | 1.11 (1.03-1.19)     | 0.42 (0.37-0.47)     | 0.44 (0.39-0.49)     | 0.58 (0.53-0.64)     | 0.67 (0.61-0.74)     |
| Other/Multiple                    | 0.94 (0.85-1.03)     | 1.08 (0.99-1.18)     | 0.37 (0.31-0.43)     | 0.40 (0.35-0.47)     | 0.57 (0.50-0.64)     | 0.68 (0.60-0.76)     |
| <b>Age</b>                        |                      |                      |                      |                      |                      |                      |
| 15–24                             | 0.72 (0.68-0.77)     | 0.80 (0.76-0.85)     | 0.39 (0.36-0.42)     | 0.41 (0.38-0.45)     | 0.33 (0.30-0.36)     | 0.39 (0.36-0.43)     |
| 25–34                             | 0.95 (0.90-1.01)     | 1.07 (1.01-1.13)     | 0.48 (0.45-0.52)     | 0.51 (0.47-0.55)     | 0.47 (0.43-0.51)     | 0.56 (0.52-0.60)     |
| 35–44                             | 1.20 (1.12-1.29)     | 1.36 (1.28-1.45)     | 0.47 (0.42-0.52)     | 0.50 (0.45-0.55)     | 0.73 (0.67-0.80)     | 0.86 (0.80-0.94)     |
| 45–54                             | 1.25 (1.17-1.32)     | 1.50 (1.42-1.59)     | 0.39 (0.35-0.44)     | 0.44 (0.40-0.49)     | 0.85 (0.79-0.92)     | 1.06 (0.99-1.13)     |
| 55–65                             | 1.11 (1.04-1.18)     | 1.44 (1.36-1.53)     | 0.29 (0.26-0.33)     | 0.35 (0.31-0.39)     | 0.82 (0.75-0.88)     | 1.09 (1.02-1.17)     |
| <b>Census Region and Division</b> |                      |                      |                      |                      |                      |                      |
| <i>West</i>                       | 1.00 (0.95-1.06)     | 1.16 (1.10-1.22)     | 0.40 (0.36-0.43)     | 0.43 (0.40-0.47)     | 0.60 (0.56-0.65)     | 0.73 (0.68-0.78)     |
| Pacific                           | 1.10 (1.03-1.17)     | 1.27 (1.20-1.35)     | 0.41 (0.36-0.45)     | 0.44 (0.39-0.48)     | 0.69 (0.63-0.75)     | 0.83 (0.77-0.90)     |
| Mountain                          | 0.80 (0.72-0.89)     | 0.93 (0.84-1.02)     | 0.38 (0.32-0.44)     | 0.42 (0.36-0.48)     | 0.42 (0.36-0.49)     | 0.51 (0.44-0.58)     |
| <i>Midwest</i>                    | 0.99 (0.93-1.05)     | 1.16 (1.09-1.22)     | 0.42 (0.38-0.46)     | 0.46 (0.42-0.50)     | 0.57 (0.52-0.61)     | 0.70 (0.65-0.75)     |
| West North Central                | 0.99 (0.88-1.11)     | 1.14 (1.02-1.27)     | 0.45 (0.38-0.53)     | 0.49 (0.41-0.57)     | 0.54 (0.46-0.63)     | 0.65 (0.56-0.75)     |
| East North Central                | 0.99 (0.91-1.06)     | 1.16 (1.08-1.24)     | 0.41 (0.37-0.46)     | 0.44 (0.39-0.49)     | 0.57 (0.52-0.63)     | 0.72 (0.66-0.79)     |
| <i>South</i>                      | 1.00 (0.96-1.05)     | 1.16 (1.12-1.22)     | 0.42 (0.39-0.45)     | 0.45 (0.42-0.48)     | 0.59 (0.55-0.62)     | 0.72 (0.68-0.76)     |
| West South Central                | 1.03 (0.95-1.12)     | 1.20 (1.11-1.30)     | 0.42 (0.36-0.47)     | 0.46 (0.40-0.52)     | 0.62 (0.55-0.69)     | 0.75 (0.68-0.83)     |
| East South Central                | 0.97 (0.84-1.10)     | 1.17 (1.03-1.31)     | 0.45 (0.36-0.54)     | 0.48 (0.39-0.57)     | 0.52 (0.43-0.62)     | 0.69 (0.59-0.80)     |
| South Atlantic                    | 0.99 (0.94-1.06)     | 1.15 (1.08-1.21)     | 0.41 (0.37-0.45)     | 0.44 (0.40-0.48)     | 0.58 (0.54-0.63)     | 0.71 (0.66-0.76)     |
| <i>Northeast</i>                  | 1.01 (0.95-1.08)     | 1.22 (1.15-1.30)     | 0.40 (0.36-0.45)     | 0.44 (0.40-0.49)     | 0.61 (0.56-0.66)     | 0.78 (0.73-0.84)     |
| Middle Atlantic                   | 1.04 (0.96-1.12)     | 1.24 (1.16-1.33)     | 0.40 (0.35-0.45)     | 0.44 (0.39-0.49)     | 0.64 (0.58-0.71)     | 0.81 (0.74-0.88)     |
| New England                       | 0.94 (0.83-1.07)     | 1.17 (1.04-1.31)     | 0.41 (0.33-0.49)     | 0.45 (0.37-0.54)     | 0.54 (0.45-0.63)     | 0.72 (0.62-0.83)     |
| <b>Urbanicity (County)</b>        |                      |                      |                      |                      |                      |                      |
| Large Central Metro               | 1.04 (1.00-1.09)     | 1.24 (1.19-1.29)     | 0.41 (0.38-0.44)     | 0.45 (0.42-0.48)     | 0.64 (0.60-0.67)     | 0.79 (0.75-0.83)     |
| Large Fringe Metro                | 0.99 (0.93-1.05)     | 1.15 (1.09-1.22)     | 0.39 (0.36-0.43)     | 0.42 (0.38-0.46)     | 0.59 (0.55-0.64)     | 0.73 (0.68-0.78)     |
| Medium Metro                      | 0.98 (0.92-1.05)     | 1.12 (1.05-1.19)     | 0.45 (0.40-0.49)     | 0.47 (0.43-0.52)     | 0.54 (0.49-0.59)     | 0.64 (0.59-0.69)     |
| Small Metro                       | 0.97 (0.88-1.07)     | 1.12 (1.02-1.23)     | 0.43 (0.37-0.49)     | 0.46 (0.40-0.53)     | 0.54 (0.48-0.62)     | 0.66 (0.58-0.74)     |
| Micropolitan                      | 0.86 (0.74-0.98)     | 1.05 (0.93-1.19)     | 0.39 (0.32-0.48)     | 0.42 (0.34-0.51)     | 0.47 (0.38-0.56)     | 0.63 (0.53-0.74)     |
| Nonmetro                          | 0.91 (0.77-1.07)     | 1.06 (0.90-1.22)     | 0.34 (0.26-0.44)     | 0.39 (0.30-0.49)     | 0.58 (0.47-0.70)     | 0.67 (0.55-0.80)     |
| <b>HIV Status</b>                 |                      |                      |                      |                      |                      |                      |
| Negative                          | 1.03 (0.99-1.06)     | 1.22 (1.18-1.25)     | 0.42 (0.40-0.44)     | 0.45 (0.43-0.48)     | 0.61 (0.58-0.63)     | 0.76 (0.74-0.79)     |
| Positive                          | 1.41 (1.30-1.52)     | 1.54 (1.42-1.66)     | 0.46 (0.39-0.52)     | 0.48 (0.42-0.55)     | 0.95 (0.86-1.05)     | 1.06 (0.96-1.16)     |
| Unknown                           | 0.64 (0.59-0.70)     | 0.74 (0.68-0.80)     | 0.34 (0.30-0.38)     | 0.37 (0.33-0.42)     | 0.30 (0.26-0.34)     | 0.36 (0.32-0.41)     |

AI: Anal Intercourse; OI: Oral Intercourse

**Supplemental Table 2.** Heterogeneity in One-Time Partner Acquisition Rates (per Week), by Demographics and HIV Status, Stratified by Anal versus Oral Sexual Activity, among MSM in the United States

|                            | <b>AI</b>           | <b>OI</b>           |
|----------------------------|---------------------|---------------------|
|                            | Mean (95% CI)       | Mean (95% CI)       |
| <b>Total</b>               | 0.088 (0.079-0.096) | 0.064 (0.057-0.071) |
| <b>Race/Ethnicity</b>      |                     |                     |
| Black, Non-Hispanic        | 0.068 (0.041-0.104) | 0.039 (0.020-0.067) |
| White, Non-Hispanic        | 0.091 (0.082-0.102) | 0.068 (0.060-0.077) |
| Hispanic                   | 0.085 (0.065-0.109) | 0.060 (0.043-0.080) |
| Other/Multiple             | 0.072 (0.050-0.100) | 0.050 (0.032-0.074) |
| <b>Age (years)</b>         |                     |                     |
| 15-24                      | 0.058 (0.046-0.072) | 0.034 (0.025-0.045) |
| 25-34                      | 0.080 (0.066-0.097) | 0.043 (0.033-0.056) |
| 35-44                      | 0.112 (0.089-0.139) | 0.076 (0.057-0.098) |
| 45-54                      | 0.119 (0.097-0.144) | 0.095 (0.076-0.118) |
| 55-65                      | 0.094 (0.074-0.117) | 0.101 (0.080-0.125) |
| <b>Region and Division</b> |                     |                     |
| <i>West</i>                | 0.097 (0.080-0.115) | 0.065 (0.052-0.081) |
| Pacific                    | 0.108 (0.087-0.132) | 0.073 (0.056-0.093) |
| Mountain                   | 0.074 (0.050-0.103) | 0.050 (0.031-0.075) |
| <i>Midwest</i>             | 0.084 (0.068-0.104) | 0.058 (0.044-0.074) |
| West North Central         | 0.083 (0.054-0.120) | 0.057 (0.034-0.088) |
| East North Central         | 0.085 (0.065-0.109) | 0.058 (0.042-0.078) |
| <i>South</i>               | 0.082 (0.069-0.096) | 0.058 (0.047-0.070) |
| West South Central         | 0.086 (0.062-0.114) | 0.046 (0.029-0.067) |
| East South Central         | 0.062 (0.034-0.100) | 0.090 (0.056-0.135) |
| South Atlantic             | 0.085 (0.068-0.103) | 0.057 (0.044-0.072) |
| <i>Northeast</i>           | 0.089 (0.071-0.110) | 0.079 (0.062-0.099) |
| Middle Atlantic            | 0.091 (0.070-0.117) | 0.071 (0.052-0.094) |
| New England                | 0.084 (0.053-0.126) | 0.101 (0.066-0.145) |
| <b>Urbanicity (County)</b> |                     |                     |
| Large Central Metro        | 0.108 (0.094-0.122) | 0.074 (0.063-0.086) |
| Large Fringe Metro         | 0.082 (0.066-0.101) | 0.063 (0.049-0.080) |
| Medium Metro               | 0.067 (0.052-0.085) | 0.052 (0.039-0.069) |
| Small Metro                | 0.064 (0.043-0.092) | 0.038 (0.023-0.060) |
| Micropolitan               | 0.058 (0.032-0.096) | 0.063 (0.036-0.101) |
| Nonmetro                   | 0.075 (0.040-0.126) | 0.057 (0.027-0.103) |
| <b>HIV Status</b>          |                     |                     |
| Negative                   | 0.090 (0.081-0.100) | 0.068 (0.060-0.077) |
| Positive                   | 0.164 (0.129-0.206) | 0.092 (0.066-0.124) |
| Unknown                    | 0.031 (0.020-0.046) | 0.025 (0.015-0.038) |

AI: Anal Intercourse; OI: Oral Intercourse

**Supplemental Table 3.** Heterogeneity in Duration (in Weeks) of Ongoing Sexual Partnerships by Demographics and HIV Status of Ego Participant, Stratified by Anal versus Oral Sexual Activity, among MSM in the United States

|                       | Ongoing Partnerships | AI Partnerships       |                       | OI Partnerships       |                       |
|-----------------------|----------------------|-----------------------|-----------------------|-----------------------|-----------------------|
|                       | N (%)                | Main                  | Casual                | Main                  | Casual                |
|                       |                      | <i>Mean (SD, Med)</i> | <i>Mean (SD, Med)</i> | <i>Mean (SD, Med)</i> | <i>Mean (SD, Med)</i> |
| <b>Total</b>          | 5837 (100.0)         | 259.1 (315.6, 137.3)  | 133.2 (191, 71.3)     | 273.5 (337.6, 140.6)  | 133.0 (197.2, 69.7)   |
| <b>Race/Ethnicity</b> |                      |                       |                       |                       |                       |
| Black, Non-Hispanic   | 297 (5.1)            | 265.5 (271.3, 169.9)  | 167.1 (210.5, 91.4)   | 267.8 (291.9, 147.3)  | 153.8 (206.1, 79.9)   |
| White, Non-Hispanic   | 4284 (73.4)          | 272.5 (330.8, 144.9)  | 132.7 (190.5, 70.7)   | 286.1 (349.3, 153.1)  | 134.9 (202.2, 69.6)   |
| Hispanic              | 771 (13.2)           | 211.5 (270.3, 100.8)  | 121.8 (176.9, 64.4)   | 224.0 (295.0, 105.9)  | 120.7 (171.7, 63.1)   |
| Other/Multiple        | 485 (8.3)            | 215.7 (246.7, 128.0)  | 131.2 (200.7, 70.9)   | 242.3 (304.0, 123.1)  | 120.8 (181.0, 67.0)   |
| <b>Age</b>            |                      |                       |                       |                       |                       |
| 15–24                 | 1079 (18.5)          | 76.9 (72.5, 55.2)     | 68.9 (86.5, 38.3)     | 74.9 (72.2, 53.2)     | 66.2 (74.4, 38.1)     |
| 25–34                 | 1382 (23.7)          | 198.9 (177.4, 154.1)  | 97.7 (137.8, 51.0)    | 196.1 (178.0, 150.1)  | 95.7 (133.8, 49.4)    |
| 35–44                 | 966 (16.5)           | 318.9 (284.2, 248.8)  | 128.6 (168.2, 77.4)   | 324.6 (288.1, 248.8)  | 129.0 (174.6, 75.6)   |
| 45–54                 | 1273 (21.8)          | 405.8 (377.1, 271.5)  | 162.6 (233.1, 86.0)   | 433.7 (399.3, 288.0)  | 161.5 (228.9, 85.7)   |
| 55–65                 | 1137 (19.5)          | 541.1 (515.9, 343.4)  | 181.3 (228.7, 103.9)  | 575.9 (535.0, 376.9)  | 178.2 (248.8, 93.1)   |
| <b>HIV Status</b>     |                      |                       |                       |                       |                       |
| Negative              | 4602 (78.8)          | 266.5 (315.6, 147.7)  | 131.1 (186.7, 73.1)   | 281.7 (335.2, 153.1)  | 130.8 (193.9, 69.3)   |
| Positive              | 677 (11.6)           | 330.1 (364.7, 218.9)  | 162.4 (219.5, 79.4)   | 364.9 (418.3, 220.6)  | 163.8 (224.8, 79.4)   |
| Unknown               | 558 (9.6)            | 159.9 (247.1, 70.6)   | 100.7 (171.8, 50.0)   | 156.6 (243.5, 70.1)   | 104.6 (174.7, 52.3)   |

AI: Anal Intercourse; OI: Oral Intercourse

**Supplemental Table 4.** Linear Model of Duration (in Weeks) of Ongoing Sexual Partnerships by HIV and Age Status to Demonstrate Confounding Effects of Age on HIV Predictions

| <b>Model Variables</b> | <b>Overall</b> |                  | <b>Main</b> |                  | <b>Casual</b> |                  |
|------------------------|----------------|------------------|-------------|------------------|---------------|------------------|
|                        | <i>HIV</i>     | <i>HIV + Age</i> | <i>HIV</i>  | <i>HIV + Age</i> | <i>HIV</i>    | <i>HIV + Age</i> |
| <b>Intercept</b>       | 186.7          | -13.8            | 281.0       | -187.1           | 131.0         | 13.3             |
| <b>HIV Status</b>      |                |                  |             |                  |               |                  |
| Positive               | 36.6           | 5.0              | 79.3        | 12.9             | 30.2          | 2.8              |
| Unknown                | -57.4          | -1.6             | -124.9      | -21.1            | -29.4         | 10.4             |
| <b>Age (years)</b>     | ---            | -3.6             | ---         | 5.4              | ---           | -1.9             |

**Supplemental Table 5.** Mixing Matrix of Partnerships by Race/Ethnicity of Ego and Partner, Across All Partnership Types, for All Anal or Oral Sex Partnerships among MSM in the United States

|                 |                 | <b>Partner Race</b>    |                 |              |              |                |
|-----------------|-----------------|------------------------|-----------------|--------------|--------------|----------------|
|                 |                 | <b>N (Row Percent)</b> |                 |              |              |                |
|                 |                 | <i>Black</i>           | <i>Hispanic</i> | <i>Other</i> | <i>White</i> | <i>Unknown</i> |
| <b>Ego Race</b> | <i>Black</i>    | 369 (45.3)             | 94 (11.5)       | 66 (8.1)     | 267 (32.8)   | 19 (2.3)       |
|                 | <i>Hispanic</i> | 214 (9.3)              | 796 (34.5)      | 176 (7.6)    | 973 (42.2)   | 149 (6.5)      |
|                 | <i>Other</i>    | 115 (8.1)              | 277 (19.4)      | 233 (16.3)   | 688 (48.2)   | 115 (8.1)      |
|                 | <i>White</i>    | 1074 (9.2)             | 1819 (15.6)     | 996 (8.6)    | 7094 (60.9)  | 664 (5.7)      |

**Supplemental Table 6.** Mixing Matrix of Partnerships by Ego-Reported HIV Status of Ego and Partner, Across All Partnership Types, for All Anal or Oral Sex Partnerships among MSM in the United States

|                       |                     | <b>Partner HIV Status</b> |                     |                |
|-----------------------|---------------------|---------------------------|---------------------|----------------|
|                       |                     | <b>N (Row Percent)</b>    |                     |                |
|                       |                     | <i>HIV-Negative</i>       | <i>HIV-Positive</i> | <i>Unknown</i> |
| <b>Ego HIV Status</b> | <i>HIV-Negative</i> | 8752 (68.4)               | 432 (3.4)           | 3604 (28.2)    |
|                       | <i>HIV-Positive</i> | 581 (39.6)                | 367 (25.0)          | 518 (35.3)     |
|                       | <i>Unknown</i>      | 1028 (53.4)               | 33 (1.7)            | 863 (44.9)     |

**Supplemental Table 7.** Distribution of Partnership Mixing by HIV Status for Main and Casual Partnerships Compared to Expected Distributions from Random Mixing and Proportional Mixing Network Models

|                        | ARTnet Data |        | Random Mixing Model <sup>A</sup> |        | Proportional Mixing Model <sup>B</sup> |        |
|------------------------|-------------|--------|----------------------------------|--------|----------------------------------------|--------|
|                        | N           | %      | N                                | %      | N                                      | %      |
| <b>HIV Combination</b> |             |        |                                  |        |                                        |        |
| Negative-Negative      | 5393        | 62.8%  | 3447                             | 57.8%  | 3714                                   | 62.1%  |
| Negative-Positive      | 715         | 8.3%   | 788                              | 13.2%  | 1094                                   | 18.3%  |
| Negative-Unknown       | 1600        | 18.6%  | 1387                             | 23.3%  | 904                                    | 15.1%  |
| Positive-Positive      | 270         | 3.1%   | 45                               | 0.8%   | 80                                     | 1.3%   |
| Positive-Unknown       | 246         | 2.9%   | 160                              | 2.7%   | 133                                    | 2.2%   |
| Unknown-Unknown        | 358         | 4.2%   | 138                              | 2.3%   | 55                                     | 0.9%   |
| <b>Total Edges</b>     | 8582        | 100.0% | 5965                             | 100.0% | 5980                                   | 100.0% |

<sup>A</sup> Exponential random graph model (ERGM) for main and casual partnerships with only a term for overall mean degree based on ARTnet data (see Table 2), given the ARTnet empirical distribution of HIV status (see Table 1).

<sup>B</sup> ERGM for main and casual partnerships with terms for mean degree stratified by HIV status based on ARTnet data (see Table 2), given the ARTnet empirical distribution of HIV status (see Table 1).



**Supplemental Figure 1.** Cumulative Density Plot of Weekly One-Time Partner Acquisition Rate among MSM in the United States.

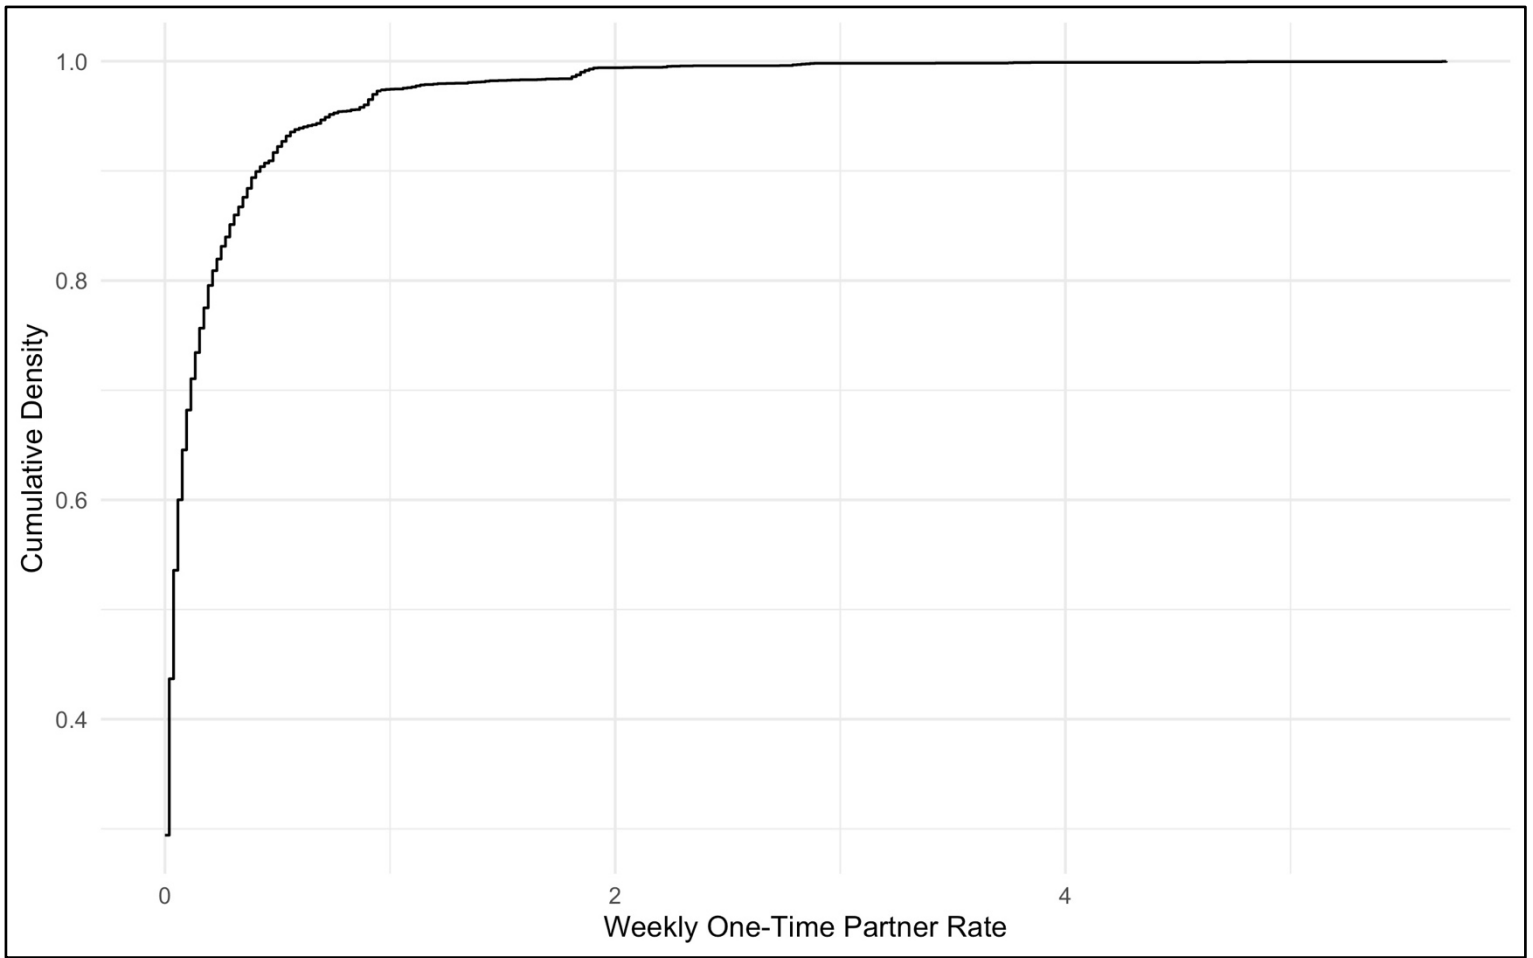

**Supplemental Figure 2.** Density Plot of Partner Ages, Stratified by Partnership Type, among MSM in the United States.

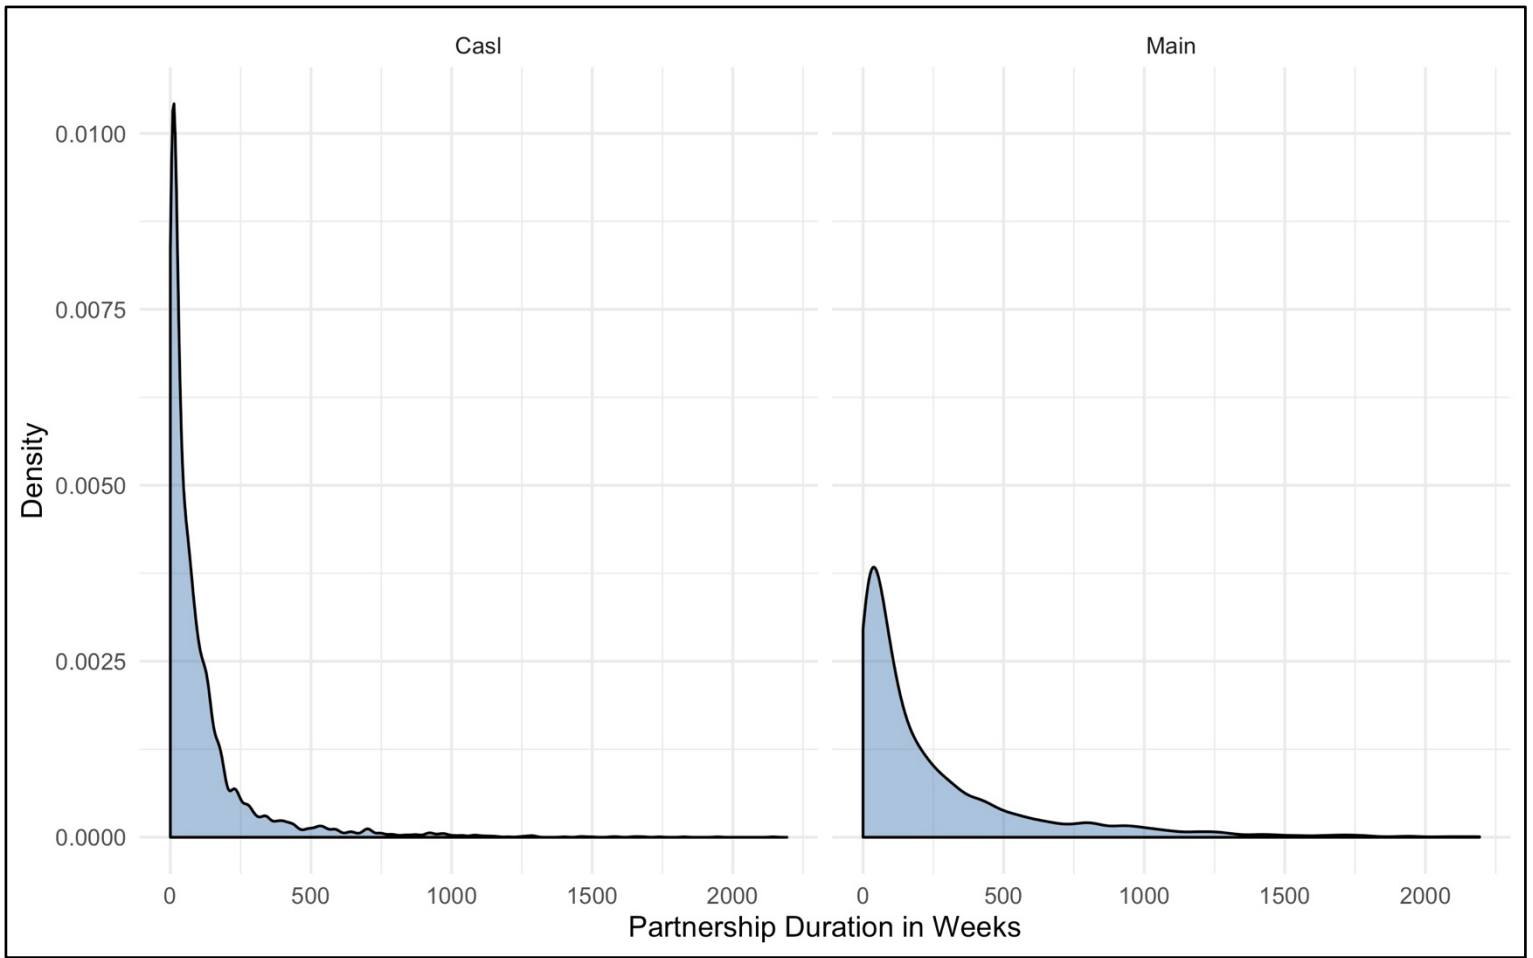

Supplement: NIHMS1555395-supplement-Supplemental_Appendix.pdf [file NIHMS1555395-supplement-Supplemental_Appendix.pdf]
